# Supplementary material
Source: ML conference proceedings conference paper supplement (https://openreview.net/forum?id=iEoccQSFFsM)
Supplement: supplementary_material [file attachment]

# Exploring Sketch-based Character Design Guided by Automatic Colorization Supplementary Material

## 1 USER STUDY PARTICIPANTS

Table 1 shows participants' years of experience in sketching, character design and using Adobe Photoshop. Participants reported this information in a survey they completed after the user study.

| Participant | Sketching | Character Design | Photoshop |
|-------------|-----------|------------------|-----------|
| P1          | 4         | 1                | 2         |
| P2          | 5         | 2                | 10        |
| P3          | 7         | 1                | 7         |
| P4          | <1        | <1               | <1        |
| P5          | 2         | <1               | 4         |
| P6          | 7         | 1                | 8         |
| P7          | 11        | 11               | <1        |
| P8          | <1        | <1               | <1        |
| P9          | <1        | <1               | 8         |
| P10         | 5         | 1                | 2         |
| P11         | 10        | 10               | 3         |
| P12         | 15        | 7                | 6         |
| P13         | 18        | 3                | 5         |
| P14         | 5         | 2                | 1         |
| P15         | 1         | 0                | 2         |
| P16         | 11        | 5                | 7         |
| P17         | 7         | 2                | 1         |
| P18         | 1         | <1               | 1         |
| P19         | <1        | <1               | <1        |
| P20         | 2         | 1                | <1        |
| P21         | 10        | 5                | 7         |
| P22         | 5         | 2                | 5         |
| P23         | 6         | 3                | 3         |
| P24         | 5         | <1               | 5         |
| P25         | 8         | 4                | <1        |
| P26         | 4         | 1                | <1        |
| P27         | <1        | <1               | 1         |

Figure 1: The participants' years of experience with sketching, character design, and using Adobe Photoshop.
